# Supplementary material for: Blood immune profiles reveal a CXCR3/CCR5 axis of dysregulation in early sepsis
Source: bioRxiv or medRxiv preprint supplement (doi:10.1101/2024.03.21.24304671), 2024-03-24
Supplement: Supplementary file [file media-1.pdf]

## 1- supplemental figures and tables legends:

**S1: Antibody panels used for blood cell phenotyping.** The blood cell panel (BCP) and T cell activation panel (TCAP). Includes antibody names, source and manufacturer references. The matrixes indicate the antibody combinations used for full staining (BCP or TCAP) plus Fluorescence minus one (FMO) controls.

**S2: General flow cytometry gating strategy for analysis.** A) For general cell types within blood isolated PBMCs; B) BCP-specific: to select monocytes, T ad B cells according to CD14, CD3 and CD19 expression, respectively before analysing the percentage of cells expressing the indicated surface markers; C) TCAP-specific: to separate CD8<sup>+</sup> and CD4<sup>+</sup> from lymphocytes before analysing the percentage of cells expressing the indicated markers.

**S3: Monocytes subsets.** A) Scatter plot showing percentage of CD14<sup>+</sup> monocytes for the healthy controls and suspected sepsis groups, with Mean values +/-SD; B) Flow cytometry scatter plot showing CD14/CD16 gating on classical, intermediate and non-classical monocytes (CM, IM and NCM, respectively) and graph plotting the percentage of monocytes for each subpopulation, with Mean +/-SD.

**S4: Expression of CCR1, CCR7 and TLR2 on monocytes subpopulations.** Boxplots showing the percentage of positive cells for each marker, Boxplots for both healthy (white) and suspected sepsis (grey) groups are shown with all points plotted. Mann-Whitney tests showed no statistical differences.

**S5: PCA for BCP panel variables:** Principal component analysis (PCA) scores plot for the first two components for the blood cell panel dataset with healthy controls in black and sepsis-suspected patients in red. The biplot shows the loadings as vectors (black arrows) and scores by sample names in grey.

**S6: Flow cytometry gating strategy for subpopulations with TCAP.** A) gating for single marker analysis, B) CXCR3/CCR5 co-expression, C) CD45RO/CD25 double positive cells, all with gates set based on the relevant FMO controls.

**S7: Markers expression profiles on T cells subpopulations.** Frequency of CD8<sup>+(high)</sup> and CD4<sup>+</sup> T cells that are A) CXCR3/CCR5 double positive, B) Memory T cells (CD45RO<sup>+</sup>), C) CXCR3/CCR5 double positive Type-1 like regulatory T cells (CD45RO/CD25), D) TLR2

positive memory T cells (CD45RO<sup>+</sup>). Boxplots for both healthy and suspected sepsis groups are shown with all points plotted. Statistical significance (adjusted p values) were determined using Mann-Whitney tests with adjustment for multiple comparisons using Benjamini, Krieger and Yekutieli secondary test.

**S8: PCA for all TCAP variables.** Principal component analysis (PCA) scores plot for the first two components for the T cell activation panel dataset with healthy controls in black and sepsis-suspected patients in red. The biplot shows the loadings as vectors (black arrows) and scores by sample names in grey.

**S9: Spearman correlation analysis for CC and sCD14 profiles on sepsis subgroups.** Heatmaps showing correlation matrix after hierarchical clustering for confirmed and unconfirmed sepsis subgroups.

**S10: PCA graphs identifying sepsis subgroups.** Principal component analysis plots for the first two components grouping healthy controls (black), confirmed sepsis (sepsis, red) and unconfirmed sepsis (purple) cases for variables from (A) the three separate datasets and (B) the three datasets combined. The scores plot obtained using variables from all datasets (see Table S2) shows grouping of healthy controls (black ellipse) but does not separate the patient sub-groups.

**Table S1:** relevant clinical information regarding patients recruited upon admission to York hospital ED with suspected sepsis, including microbiology tests results and clinical diagnostic upon discharge.

**Table S2:** Full dataset of variables and measures incorporated in the study analysis.

## 2- Supplemental Figures

Figure S1:

| Antibodies |            |                    | Blood cell panel (BCP) |           |          |        |                   |           |         |           |                  |         |     |           |
|------------|------------|--------------------|------------------------|-----------|----------|--------|-------------------|-----------|---------|-----------|------------------|---------|-----|-----------|
| sources    | Ref number |                    | FMO BV421              | FMO BV510 | FMO A488 | FMO PE | FMO PE/Dazzle 594 | FMO BV650 | FMO APC | FMO PerCP | FMO APC/Fire 750 | FMO 808 | BCP | Unstained |
|            |            | BV421 CD16         |                        | x         | x        | x      | x                 | x         | x       | x         | x                | x       | x   |           |
|            |            | BV510 CCR2         | x                      |           | x        | x      | x                 | x         | x       | x         | x                | x       | x   |           |
| Biologends | 301038     | A488 CCR5          | x                      | x         |          | x      | x                 | x         | x       | x         | x                | x       | x   |           |
| Biologends | 302048     | PE TLR2.1          | x                      | x         | x        |        | x                 | x         | x       | x         | x                | x       | x   |           |
| In house   | Clone MC5  | PE/Dazzle 594 CCR7 | x                      | x         | x        | x      |                   | x         | x       | x         | x                | x       | x   |           |
| Biologends | 309708     | BV650 CD19         | x                      | x         | x        | x      | x                 |           | x       | x         | x                | x       | x   |           |
| Biologends | 353236     | APC CCR1           | x                      | x         | x        | x      | x                 | x         |         | x         | x                | x       | x   |           |
| Biologends | 302238     | PerCP CD14         | x                      | x         | x        | x      | x                 | x         |         |           | x                | x       | x   |           |
| Biologends | 362908     | APC/Fire 750 CD3   | x                      | x         | x        | x      | x                 | x         | x       | x         |                  | x       | x   |           |
| Biologends | 325632     | 808 Live/Dead      | x                      | x         | x        | x      | x                 | x         | x       | x         | x                |         | x   |           |

x = includes this fluorophore

| Antibodies |            |                   | T-cell activation panel (TCAP) |          |        |                   |          |          |                  |         |      |           |
|------------|------------|-------------------|--------------------------------|----------|--------|-------------------|----------|----------|------------------|---------|------|-----------|
| sources    | Ref number |                   | FMO BV421                      | FMO FITC | FMO PE | FMO PE/Dazzle 594 | FMO A647 | FMO A700 | FMO APC/Fire 750 | FMO 808 | TCAP | Unstained |
|            |            | BV421 CD25        |                                | x        | x      | x                 | x        | x        | x                | x       | x    |           |
|            |            | FITC TLR2.5       | x                              |          | x      | x                 | x        | x        | x                | x       | x    |           |
| Biologends | 302630     | PE CD28           | x                              | x        |        | x                 | x        | x        | x                | x       | x    |           |
| Abcam      | ab16894    | PE/Dazzle 594 CD4 | x                              | x        | x      |                   | x        | x        | x                | x       | x    |           |
| Biologends | 353236     | A647 CCR5         | x                              | x        | x      | x                 |          | x        | x                | x       | x    |           |
| Biologends | 300548     | A700 CD45RO       | x                              | x        | x      | x                 | x        |          | x                | x       | x    |           |
| In house   | Clone MC5  | APC/Fire 750 CD8  | x                              | x        | x      | x                 | x        |          |                  | x       | x    |           |
| Biologends | 304218     | 808 Live/Dead     | x                              | x        | x      | x                 | x        | x        | x                |         | x    |           |

x = includes this fluorophore

# Figure S2:

## A. General Blood-isolated cells gating:

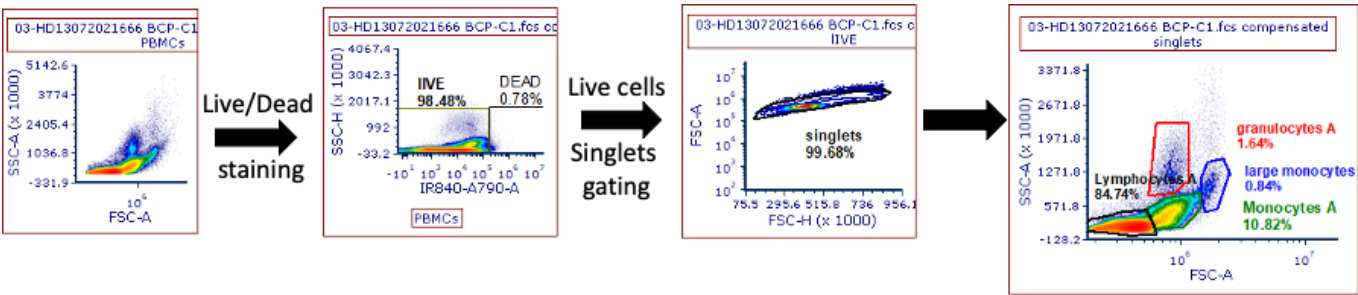

## B. Blood cell Panel (BCP) specific gating:

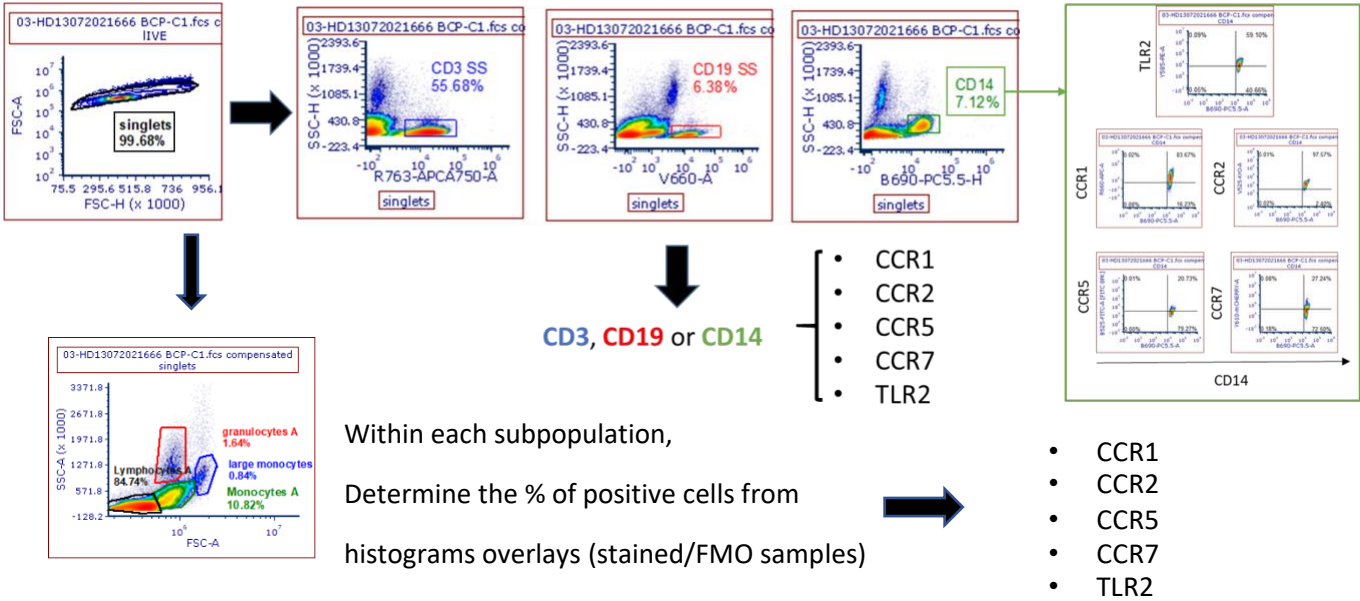

## C. T cell Panel (TCAP) specific gating strategy:

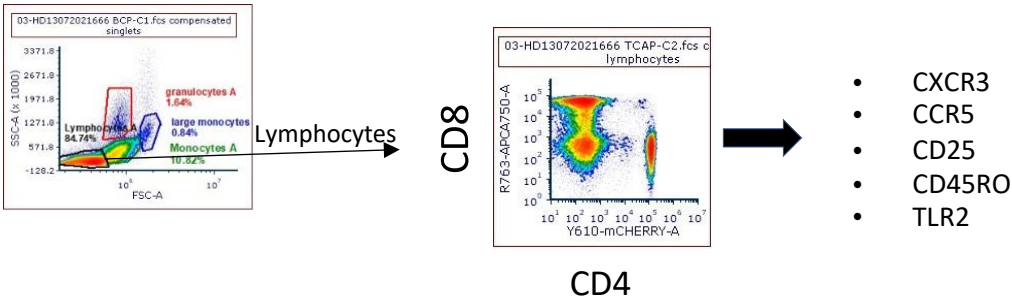

**Figure S3:**

**A. CD14<sup>+</sup> cells in monocytes population**

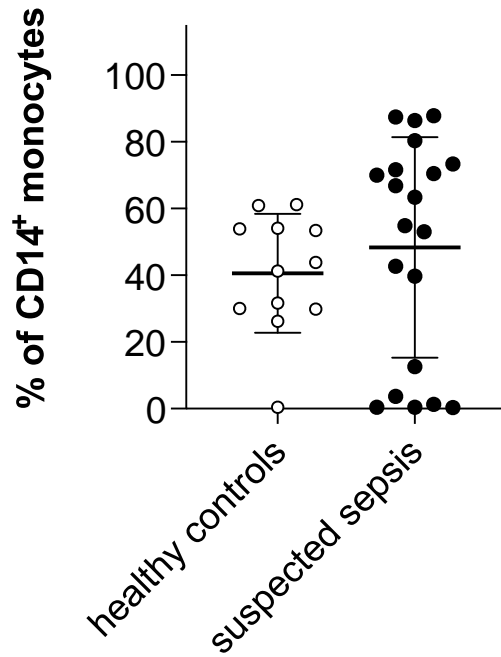

**B. CD14 and CD16 expression to define Classical, Intermediate and non-classical monocyte subsets (CM, IM and NCM)**

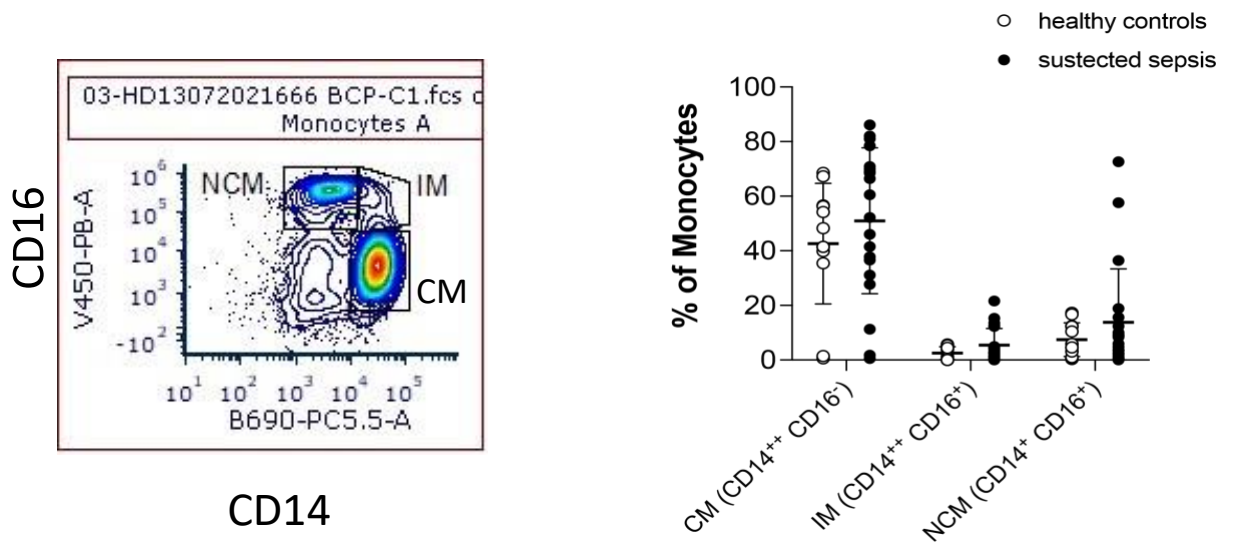

Figure S4:

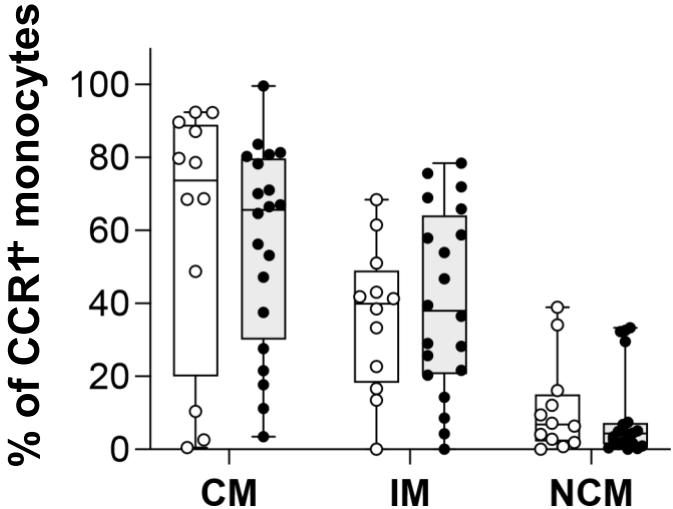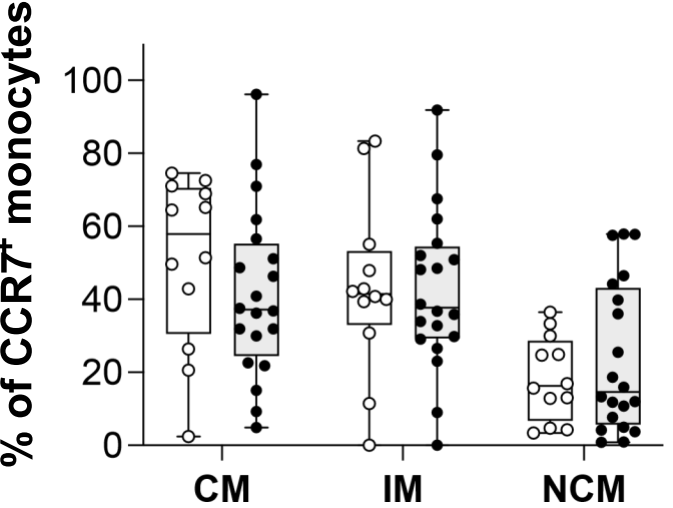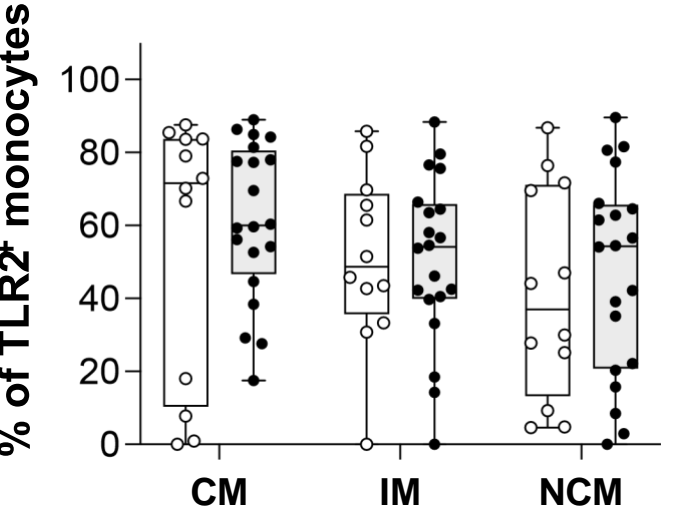

Figure S5:

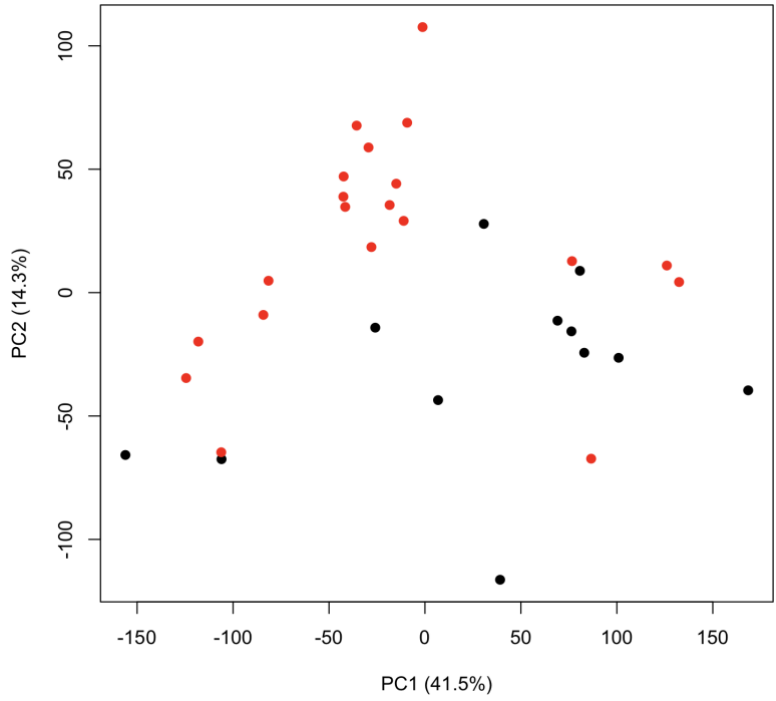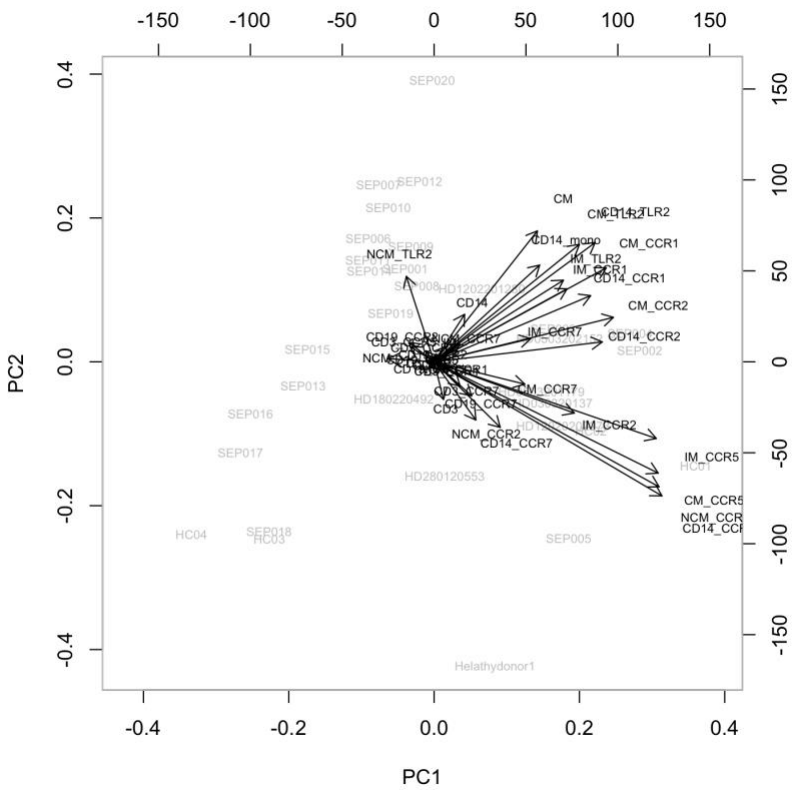

**Figure S6:**

**A.**

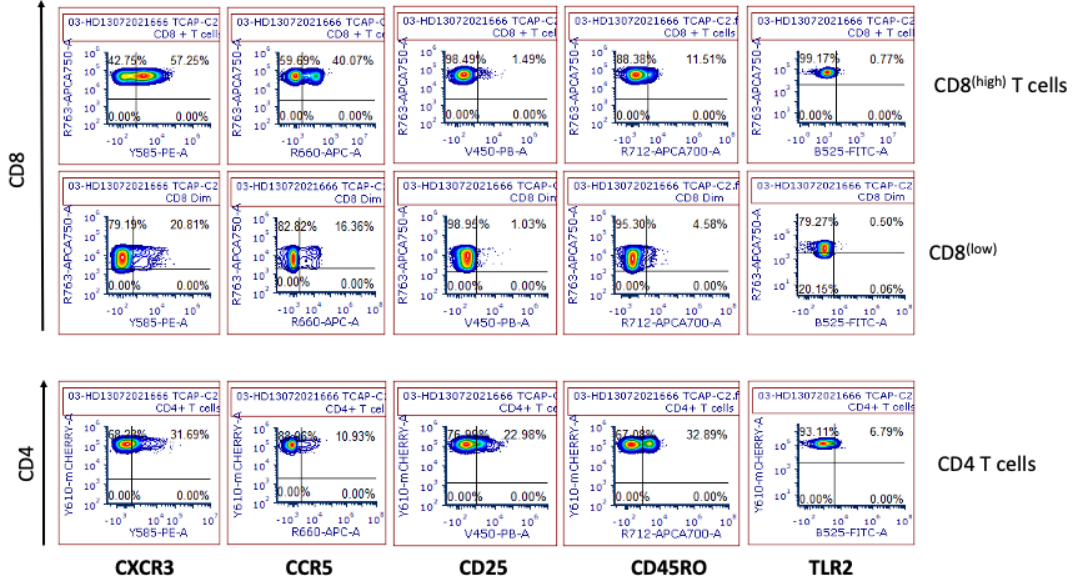

**B.**

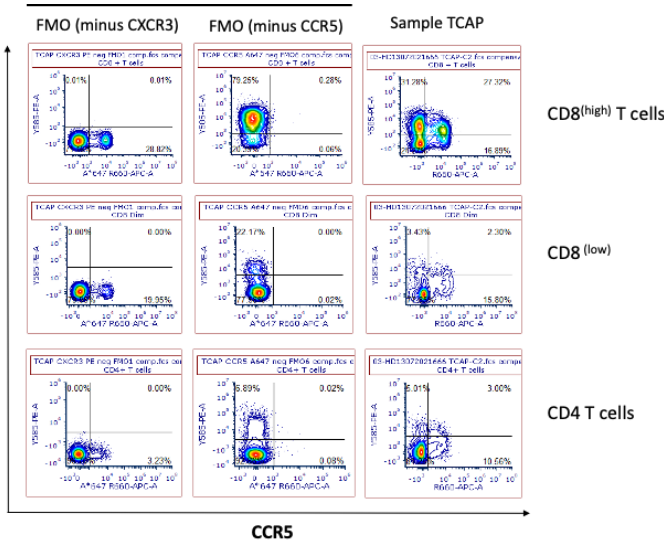

**C.**

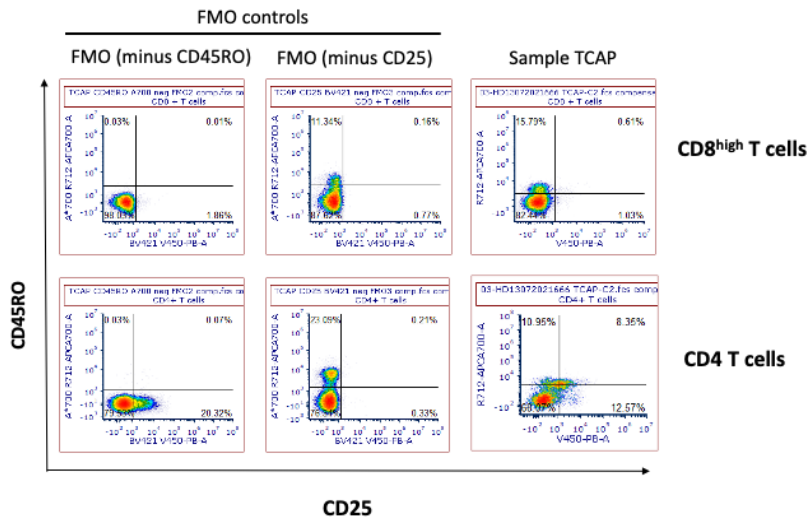



Figure S7:

A

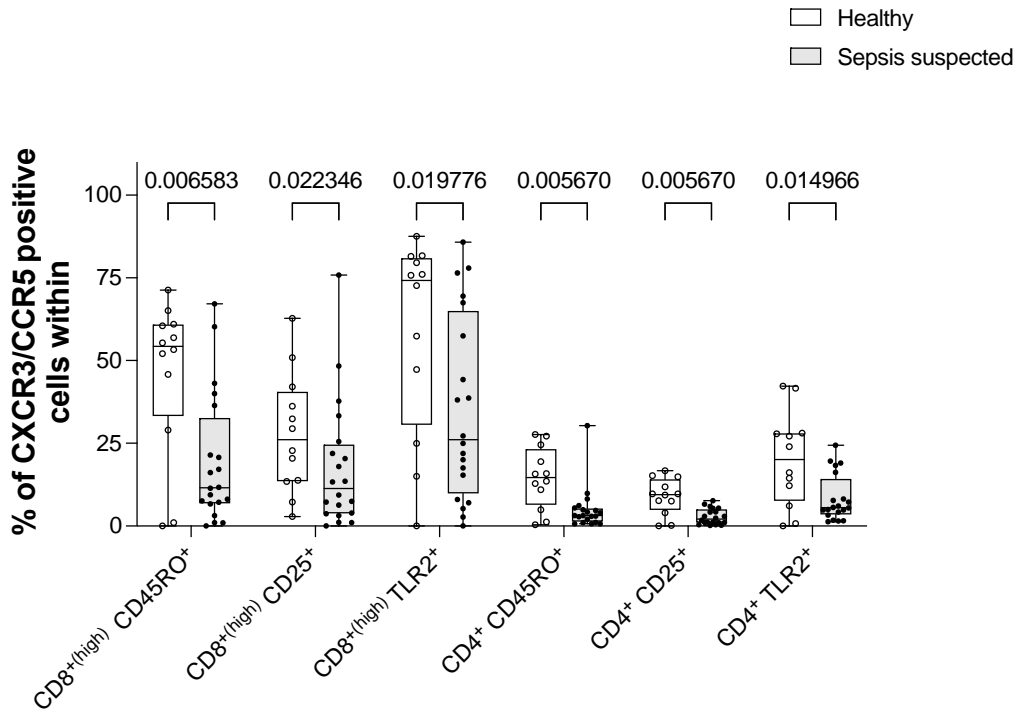

B

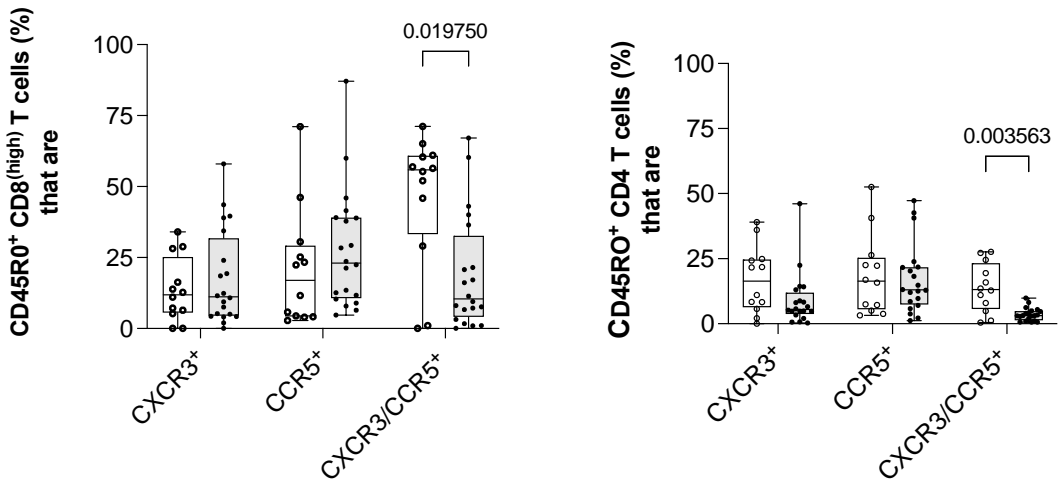

C

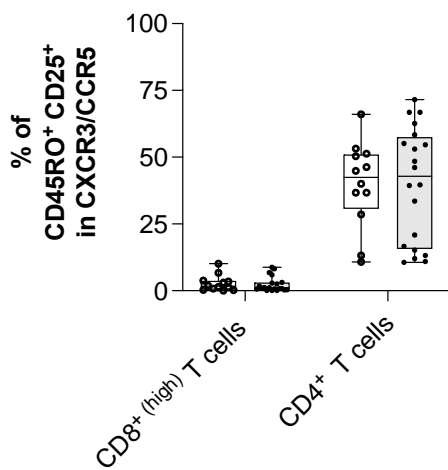

D

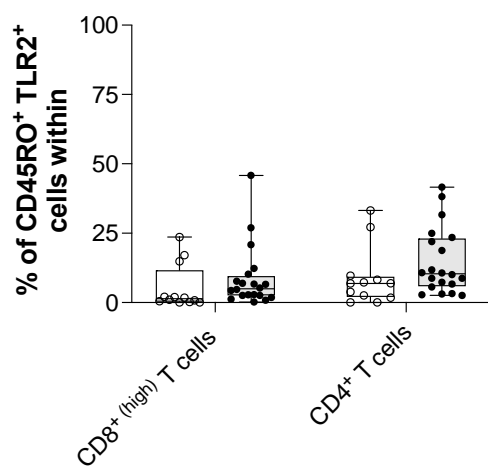

Figure S8:

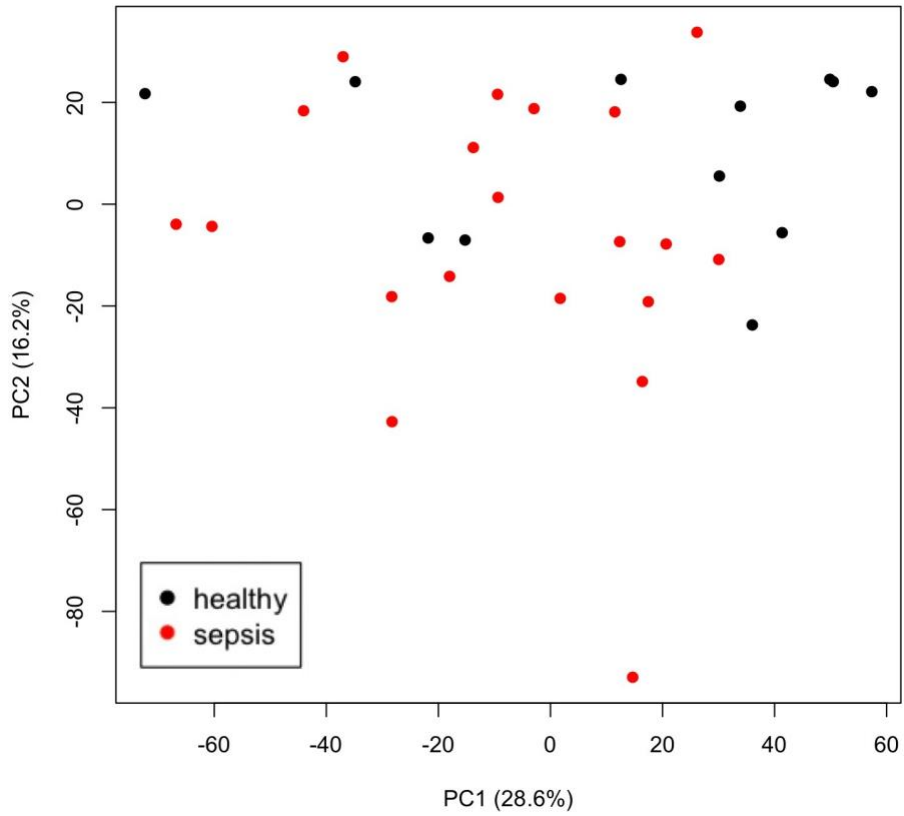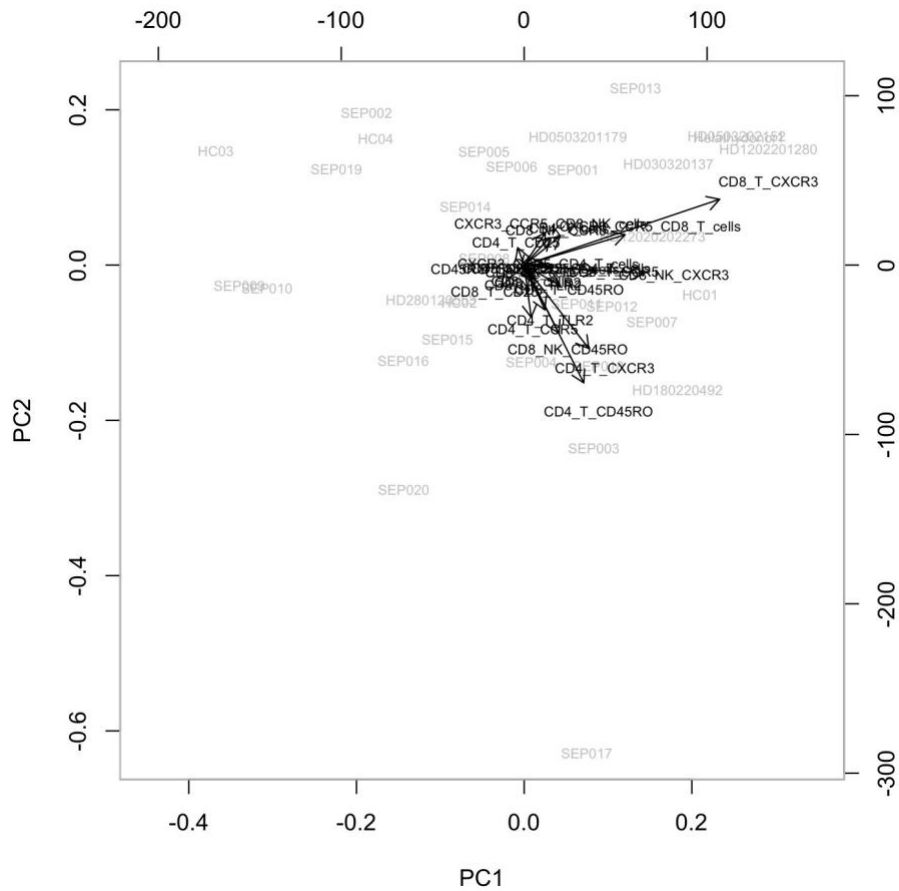

Figure S9:

### Confirmed Sepsis

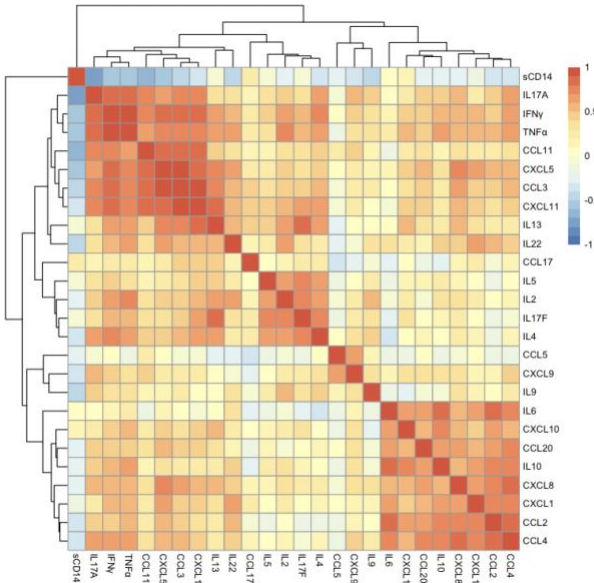

### Unconfirmed Sepsis

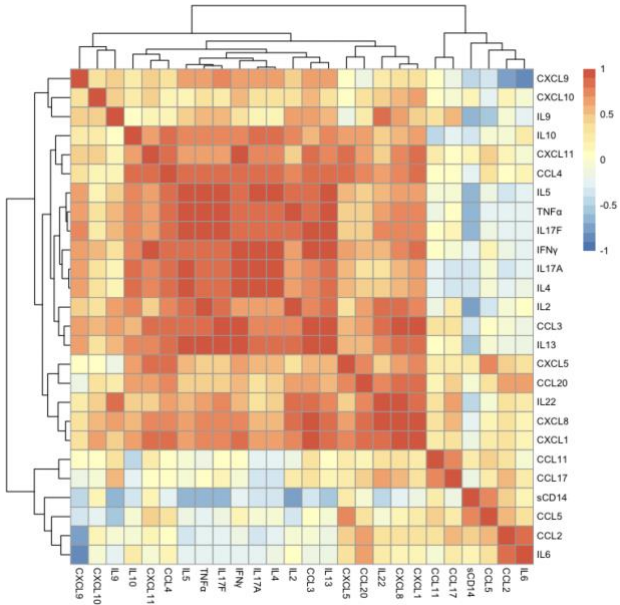

**Figure S10:**

**A.**

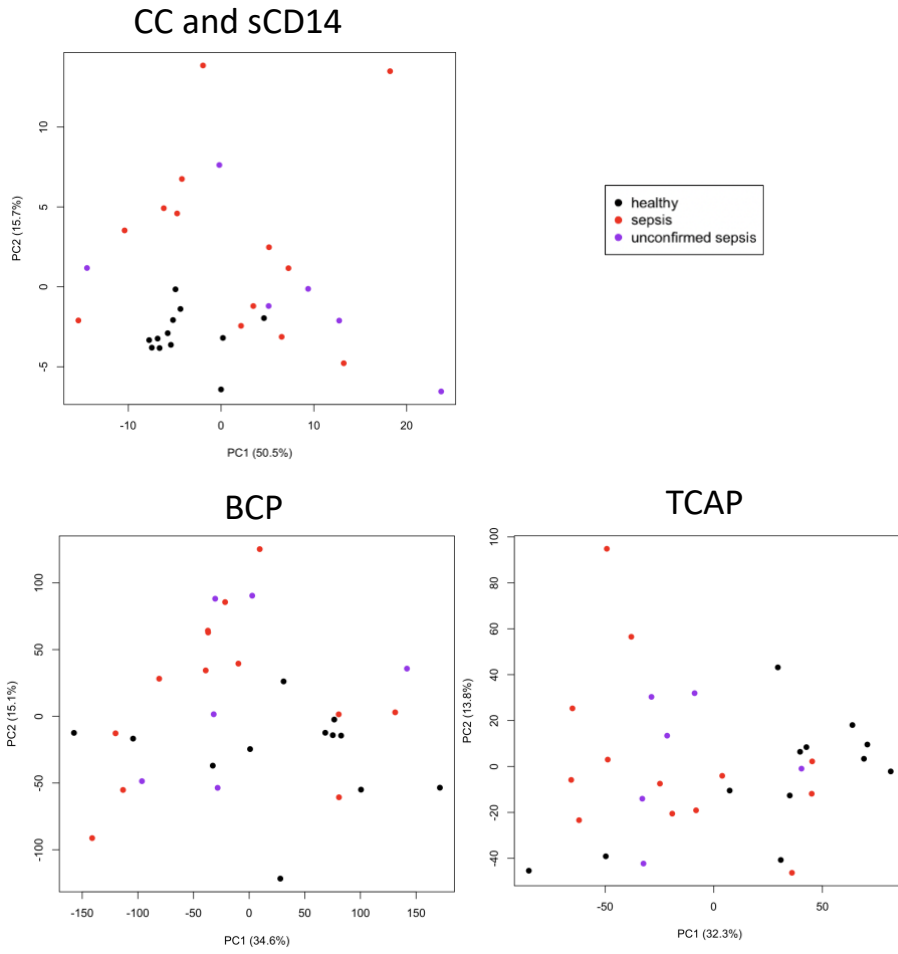

**B.**

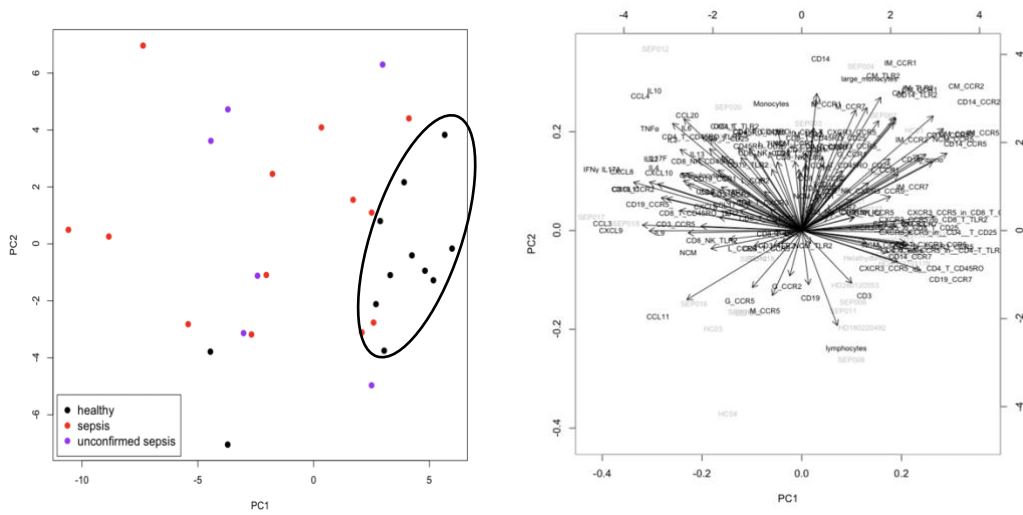

### 3- Supplemental Tables:

**Table S1:**

| Patient | Age | Sex    | Presenting Complaint | Diagnosis in ED                 | WBC upon enrolment (109/L) |                 | Status at Discharge | Vasoactive Infusion                   | Culture Results                                                                        | CXR Results | Peak CRP within 48 hours | Gram Positive Infection?                                           | Diagnosis on Discharge                                                                       | Sepsis status on Discharge |  |  |  |
|---------|-----|--------|----------------------|---------------------------------|----------------------------|-----------------|---------------------|---------------------------------------|----------------------------------------------------------------------------------------|-------------|--------------------------|--------------------------------------------------------------------|----------------------------------------------------------------------------------------------|----------------------------|--|--|--|
|         |     |        |                      |                                 | normal range 4.5-11        | Length of Stay  |                     |                                       |                                                                                        |             |                          |                                                                    |                                                                                              |                            |  |  |  |
| SEP001  | 37  | Female | Drowsiness           | Chest sepsis                    | 24.5                       | 2 days          | Alive               | No                                    | 2x BCs Negal Right basal consolidation                                                 |             | 152                      | Possible - CAP but no positive cultures                            | CAP                                                                                          | Confirmed                  |  |  |  |
| SEP002  | 60  | Male   | Confusion            | Sepsis 2y to cellulitis         | 18.8                       | 16 days         | Alive               | No                                    | 2x BCs Negal N/A                                                                       |             | 164                      | Possible - swab grew S aureus                                      | Sepsis of unknown origin, AKI, hypokalaemia, hyponatraemia, venous leg ulcers                | Confirmed                  |  |  |  |
| SEP003  | 56  | Female | Shortness of breath  | Chest sepsis                    | 17.7                       | 77 days         | Alive               | Yes                                   | 2x BCs Negal Bilateral basal haziness                                                  |             | 165                      | Unlikely - ? Viral exacerbation of asthma.                         | Infective exacerbation of asthma, metapneumovirus positive, AKI, C. difficile infection, UTI | Confirmed                  |  |  |  |
| SEP004  | 54  | Male   | SOB/cough            | CAP                             | 21.7                       | 1 day           | Alive               | No                                    | 2x BCs Negal Slight haziness right side                                                |             | 137                      | Unlikely                                                           | IECOPD                                                                                       | Unconfirmed                |  |  |  |
| SEP005  | 91  | Female | SOB, confusion       | Pneumonia                       | 5.7                        | Less than 24 h. | Dead                | No                                    | 2x BCs Negal Bilateral consolidation                                                   |             | 156                      | Possible - severe CAP but no positive cultures                     | CAP                                                                                          | Confirmed                  |  |  |  |
| SEP006  | 93  | Male   | SOB                  | No diagnosis stated             | 10.8                       | 1 day           | Alive               | No                                    | 2x BCs Negal New consolidation                                                         |             | 17                       | Unlikely - CAP but no positive cultures and low CRP                | CAP                                                                                          | Confirmed                  |  |  |  |
| SEP007  | 82  | Male   | SOB                  | CAP                             | 9.1                        | 1 day           | Alive               | No                                    | 2x BCs Negal Nil acute                                                                 |             | 6                        | Unlikely - CXR clear and CRP very low                              | CAP                                                                                          | Unconfirmed                |  |  |  |
| SEP008  | 84  | Female | SOB                  | Possible sepsis, possible I     | 8.1                        | 7 days          | Alive               | No                                    | 2x BCs Negal No consolidation, heart failure                                           |             | 6                        | Unlikely - CXR heart failure and CRP very low                      | Heart failure                                                                                | Unconfirmed                |  |  |  |
| SEP009  | 87  | Female | SOB                  | Cellulitis                      | 15.4                       | 3 days          | Alive               | withdrew from study on the 28/05/2021 |                                                                                        |             |                          |                                                                    |                                                                                              |                            |  |  |  |
| SEP010  | 78  | Female | SOB/rigors           | cellulitis                      | 20.6                       | 4 days          | Alive               | No                                    | BCs - Serratia N/A                                                                     |             | 149                      | Possible - S aureus and cellulitis and responded to flucloxacillin | Cellulitis                                                                                   | Confirmed                  |  |  |  |
| SEP011  | 70  | Female | SOB                  | LRTI, Supraglottitis            | 6.5                        | 1 day           | Alive               | No                                    | Culture result N/A                                                                     |             | less than 1              | Unlikely - low CRP                                                 | Laryngopharyngeal Reflux                                                                     | Confirmed                  |  |  |  |
| SEP012  | 55  | Male   | SOB                  | Chest sepsis                    | 27.7                       | 6 days          | Alive               | No                                    | 2x BCs Negal Bilateral changes consistent with bronchiectasis                          |             | 13                       | Unlikely - bronchiectasis with Pseudomonas in sputum               | Infective exacerbation of his bronchiectasis                                                 | Unconfirmed                |  |  |  |
| SEP013  | 82  | Female | SOB                  | Acute infection-source unclear  | 10.9                       | 9 days          | Alive               | No                                    | 2x BCs Negal Bilateral bronchiectasis changes, suspected post COVID changes            |             | 33                       | Unlikely - treated as pulmonary fibrosis                           | Pulmonary fibrosis                                                                           | Unconfirmed                |  |  |  |
| SEP014  | 79  | Male   | SOB/cough            | Possible PE, possible pneumonia | 14.8                       | 7 days          | Alive               | No                                    | 2x BCs Negal Subtle basal changes, possible aspiration pneumonia                       |             | 32                       | Unlikely - H influenzae in sputum most likely pathogen             | Aspiration pneumonia                                                                         | Confirmed                  |  |  |  |
| SEP015  | 60  | Male   | SOB                  | Chest sepsis                    | 12.4                       | 3 days          | Alive               | No                                    | 2x BCs Negal Nil acute                                                                 |             | 3                        | Unlikely - antibiotics stopped on post take ward round             | Stridor caused by bilateral vocal cord palsy                                                 | Confirmed                  |  |  |  |
| SEP016  | 101 | Male   | Confusion/cough      | CAP                             | 7.9                        | 4 days          | Alive               | No                                    | 2x BCs Negal Left lower zone consolidation                                             |             | 8                        | Possible - CAP but no positive cultures and low CRP                | CAP                                                                                          | Confirmed                  |  |  |  |
| SEP017  | 78  | Male   | Confusion            | LRTI                            | 6.8                        | 5 days          | Alive               | No                                    | 2x BCs post Nil acute                                                                  |             | 134                      | No - proven gram negative bacteraemia from urine infection.        | Sepsis-no source documented                                                                  | Confirmed                  |  |  |  |
| SEP018  | 75  | Male   | SOB/drowsy           | IECOPD                          | 15                         | 2 days          | Alive               | No                                    | 2x BCs post Right lower zone, suspected consolidation                                  |             | 5                        | Unlikely - low CRP and previous H influenzae in sputum             | CAP                                                                                          | Confirmed                  |  |  |  |
| SEP019  | 21  | Female | SOB                  | Chest sepsis                    | 2.8                        | 6 days          | Alive               | No                                    | 2x BCs Negal Bilateral changes, suspected COVID Pneumonia (NB test positive for COVID) |             | 41                       | Unlikely - low CRP and CXR changes typical for COVID               | COVID-19                                                                                     | Unconfirmed                |  |  |  |
| SEP020  | 63  | Male   | SOB                  | COPD                            | 15.5                       | 23 days         | Dead                | No                                    | 2x BCs, 1 bilobed Bilateral fibrosis, suspected superadded infective changes           |             | 152                      | Possible - but no positive cultures                                | Pneumonia                                                                                    | Confirmed                  |  |  |  |

SOB: Shortness of breath  
 CAP: Community-acquired pneumonia  
 LRTI: Lower respiratory tract infection  
 PE: Pulmonary embolism  
 IECOPD: Infective exacerbation of chronic obstructive pulmonary disease  
 AKI: Acute kidney injury  
 UTI: Urinary tract infection

**Table S2:**

| Patient | WBC upon enrolment (109/L) |                 |      |             |             |           |             |           |           |            | Status at Discharge | Vasoactive Infusion                   | Culture Results                                                                        | CXR Results | Peak CRP within 48 hours | Gram Positive Infection?                                           | Diagnosis on Discharge                                                                       | Sepsis status on Discharge |  |  |  |
|---------|----------------------------|-----------------|------|-------------|-------------|-----------|-------------|-----------|-----------|------------|---------------------|---------------------------------------|----------------------------------------------------------------------------------------|-------------|--------------------------|--------------------------------------------------------------------|----------------------------------------------------------------------------------------------|----------------------------|--|--|--|
|         | normal range 4.5-11        | Length of Stay  | WBC  | Neutrophils | Lymphocytes | Monocytes | Eosinophils | Basophils | Platelets | Hemoglobin |                     |                                       |                                                                                        |             |                          |                                                                    |                                                                                              |                            |  |  |  |
| SEP001  | 24.5                       | 2 days          | 12.5 | 85          | 10          | 3         | 0           | 0         | 150       | 12.5       | Alive               | No                                    | 2x BCs Negal Right basal consolidation                                                 |             | 152                      | Possible - CAP but no positive cultures                            | CAP                                                                                          | Confirmed                  |  |  |  |
| SEP002  | 18.8                       | 16 days         | 10.5 | 75          | 15          | 5         | 0           | 0         | 100       | 18.8       | Alive               | No                                    | 2x BCs Negal N/A                                                                       |             | 164                      | Possible - swab grew S aureus                                      | Sepsis of unknown origin, AKI, hypokalaemia, hyponatraemia, venous leg ulcers                | Confirmed                  |  |  |  |
| SEP003  | 17.7                       | 77 days         | 11.5 | 65          | 20          | 10        | 0           | 0         | 80        | 17.7       | Alive               | Yes                                   | 2x BCs Negal Bilateral basal haziness                                                  |             | 165                      | Unlikely - ? Viral exacerbation of asthma.                         | Infective exacerbation of asthma, metapneumovirus positive, AKI, C. difficile infection, UTI | Confirmed                  |  |  |  |
| SEP004  | 21.7                       | 1 day           | 12.5 | 85          | 10          | 3         | 0           | 0         | 150       | 21.7       | Alive               | No                                    | 2x BCs Negal Slight haziness right side                                                |             | 137                      | Unlikely                                                           | IECOPD                                                                                       | Unconfirmed                |  |  |  |
| SEP005  | 5.7                        | Less than 24 h. | 12.5 | 85          | 10          | 3         | 0           | 0         | 150       | 5.7        | Dead                | No                                    | 2x BCs Negal Bilateral consolidation                                                   |             | 156                      | Possible - severe CAP but no positive cultures                     | CAP                                                                                          | Confirmed                  |  |  |  |
| SEP006  | 10.8                       | 1 day           | 12.5 | 85          | 10          | 3         | 0           | 0         | 150       | 10.8       | Alive               | No                                    | 2x BCs Negal New consolidation                                                         |             | 17                       | Unlikely - CAP but no positive cultures and low CRP                | CAP                                                                                          | Confirmed                  |  |  |  |
| SEP007  | 9.1                        | 1 day           | 12.5 | 85          | 10          | 3         | 0           | 0         | 150       | 9.1        | Alive               | No                                    | 2x BCs Negal Nil acute                                                                 |             | 6                        | Unlikely - CXR clear and CRP very low                              | CAP                                                                                          | Unconfirmed                |  |  |  |
| SEP008  | 8.1                        | 7 days          | 12.5 | 85          | 10          | 3         | 0           | 0         | 150       | 8.1        | Alive               | No                                    | 2x BCs Negal No consolidation, heart failure                                           |             | 6                        | Unlikely - CXR heart failure and CRP very low                      | Heart failure                                                                                | Unconfirmed                |  |  |  |
| SEP009  | 15.4                       | 3 days          | 12.5 | 85          | 10          | 3         | 0           | 0         | 150       | 15.4       | Alive               | withdrew from study on the 28/05/2021 |                                                                                        |             |                          |                                                                    |                                                                                              |                            |  |  |  |
| SEP010  | 20.6                       | 4 days          | 12.5 | 85          | 10          | 3         | 0           | 0         | 150       | 20.6       | Alive               | No                                    | BCs - Serratia N/A                                                                     |             | 149                      | Possible - S aureus and cellulitis and responded to flucloxacillin | Cellulitis                                                                                   | Confirmed                  |  |  |  |
| SEP011  | 6.5                        | 1 day           | 12.5 | 85          | 10          | 3         | 0           | 0         | 150       | 6.5        | Alive               | No                                    | Culture result N/A                                                                     |             | less than 1              | Unlikely - low CRP                                                 | Laryngopharyngeal Reflux                                                                     | Confirmed                  |  |  |  |
| SEP012  | 27.7                       | 6 days          | 12.5 | 85          | 10          | 3         | 0           | 0         | 150       | 27.7       | Alive               | No                                    | 2x BCs Negal Bilateral changes consistent with bronchiectasis                          |             | 13                       | Unlikely - bronchiectasis with Pseudomonas in sputum               | Infective exacerbation of his bronchiectasis                                                 | Unconfirmed                |  |  |  |
| SEP013  | 10.9                       | 9 days          | 12.5 | 85          | 10          | 3         | 0           | 0         | 150       | 10.9       | Alive               | No                                    | 2x BCs Negal Bilateral bronchiectasis changes, suspected post COVID changes            |             | 33                       | Unlikely - treated as pulmonary fibrosis                           | Pulmonary fibrosis                                                                           | Unconfirmed                |  |  |  |
| SEP014  | 14.8                       | 7 days          | 12.5 | 85          | 10          | 3         | 0           | 0         | 150       | 14.8       | Alive               | No                                    | 2x BCs Negal Subtle basal changes, possible aspiration pneumonia                       |             | 32                       | Unlikely - H influenzae in sputum most likely pathogen             | Aspiration pneumonia                                                                         | Confirmed                  |  |  |  |
| SEP015  | 12.4                       | 3 days          | 12.5 | 85          | 10          | 3         | 0           | 0         | 150       | 12.4       | Alive               | No                                    | 2x BCs Negal Nil acute                                                                 |             | 3                        | Unlikely - antibiotics stopped on post take ward round             | Stridor caused by bilateral vocal cord palsy                                                 | Confirmed                  |  |  |  |
| SEP016  | 7.9                        | 4 days          | 12.5 | 85          | 10          | 3         | 0           | 0         | 150       | 7.9        | Alive               | No                                    | 2x BCs Negal Left lower zone consolidation                                             |             | 8                        | Possible - CAP but no positive cultures and low CRP                | CAP                                                                                          | Confirmed                  |  |  |  |
| SEP017  | 6.8                        | 5 days          | 12.5 | 85          | 10          | 3         | 0           | 0         | 150       | 6.8        | Alive               | No                                    | 2x BCs post Nil acute                                                                  |             | 134                      | No - proven gram negative bacteraemia from urine infection.        | Sepsis-no source documented                                                                  | Confirmed                  |  |  |  |
| SEP018  | 15                         | 2 days          | 12.5 | 85          | 10          | 3         | 0           | 0         | 150       | 15         | Alive               | No                                    | 2x BCs post Right lower zone, suspected consolidation                                  |             | 5                        | Unlikely - low CRP and previous H influenzae in sputum             | CAP                                                                                          | Confirmed                  |  |  |  |
| SEP019  | 2.8                        | 6 days          | 12.5 | 85          | 10          | 3         | 0           | 0         | 150       | 2.8        | Alive               | No                                    | 2x BCs Negal Bilateral changes, suspected COVID Pneumonia (NB test positive for COVID) |             | 41                       | Unlikely - low CRP and CXR changes typical for COVID               | COVID-19                                                                                     | Unconfirmed                |  |  |  |
| SEP020  | 15.5                       | 23 days         | 12.5 | 85          | 10          | 3         | 0           | 0         | 150       | 15.5       | Dead                | No                                    | 2x BCs, 1 bilobed Bilateral fibrosis, suspected superadded infective changes           |             | 152                      | Possible - but no positive cultures                                | Pneumonia                                                                                    | Confirmed                  |  |  |  |
